# Supplementary material for: Analysis of the cartilage proteome from three different mouse models of genetic skeletal diseases reveals common and discrete disease signatures
Source: PubMed Central journal article supplement (PMC3744072; doi:10.1242/bio.20135280), 2013-06-18
Supplement: supp_bio.20135280_bio.20135280-s1.pdf [file supp_bio.20135280_bio.20135280-s1.pdf]

Supplementary Material

Peter A. Bell et al. doi: 10.1242/bio.20135280

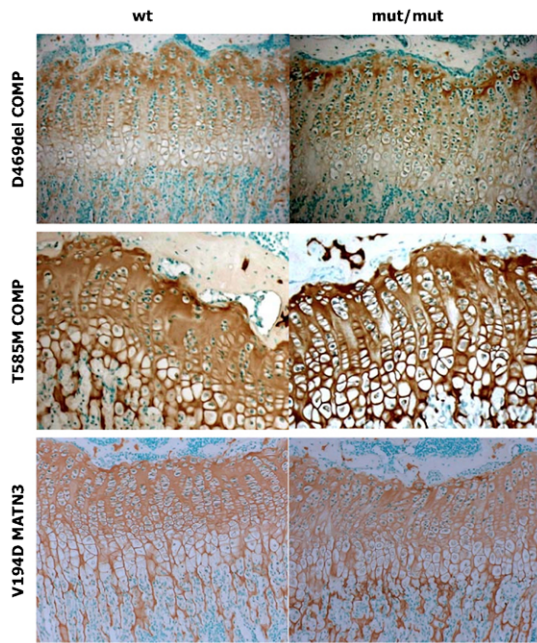

**Fig. S1. Immunohistochemistry confirms comparable levels of type IX collagen in the cartilage growth plates of mouse models of PSACH-MED.** Representative images of the growth plates of 3-week-old wild-type and mutant mice (*Matn3* V194D, *Comp* D469 del and *Comp* T585M) stained with an antibody raised against type IX collagen.

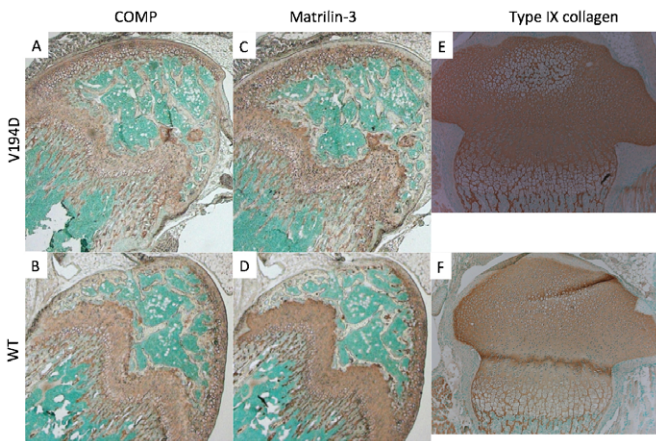

**Fig. S2. Immunohistochemistry confirms comparable levels of type IX collagen in the knee cartilage of a mouse model of *Matn3* MED.** Representative images of the knee cartilage of 3-week-old wild-type and mutant mice (*Matn3* V194D) stained with antibodies raised against COMP (A,B), matrilin-3 (C,D) and 1-week-old mouse stained with type IX collagen (E,F).

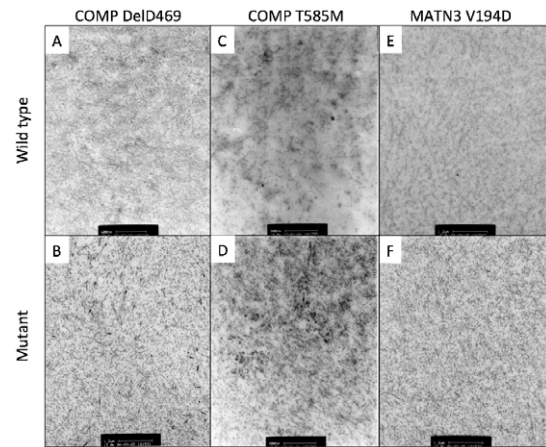

**Fig. S3. Transmission electron microscopy of cartilage from 1-week-old mice models of PSACH and MED.** Representative TEM images of the knee cartilage of 1-week-old wild-type and mutant mice; (A,B) COMP DelD469, (C,D) COMP T585M and (E,F) MATN3 V194D. The collagen fibrils were more clearly visible in mutant cartilage suggesting that lower levels of fibril surface-associated proteins were decorating individual collagen fibrils. Scale bars: 600nm (A), 1.2µm (B), 800nm (C), 800nm (D), 1.2µm (E), 1.2µm (F).

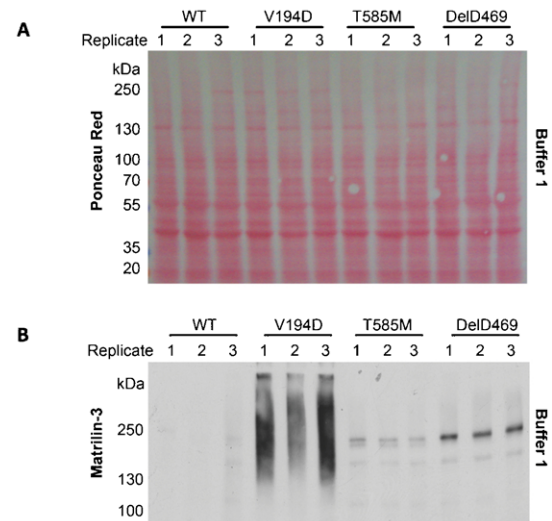

**Fig. S4. Loading controls and reproducibility of Western blot analyses of sequential protein extraction of knee joint cartilage.** Representative images of cartilage extracted with buffer 1 (3 biological replicate samples per genotype: WT, *Matn3* V194D, *Comp* D469del and *Comp*T585M) separated by SDS-PAGE, transferred to nitrocellulose membrane and (A) stained with ponceau red as a loading control and (B) probed with an antibody raised against matrilin-3.
